# Supplementary material
Source: PubMed Central journal article supplement (PMC6535520)
Supplement: AAC.02635-18-s0001.pdf [file AAC.02635-18-s0001.pdf]

## Supplemental Figure 1

|                                              | 10         | 20         | 30          | 40            | 50           | 60         | 70         | 80         | 90         | 99        |
|----------------------------------------------|------------|------------|-------------|---------------|--------------|------------|------------|------------|------------|-----------|
| HIV <sub>NL4-3</sub>                         | PQITLWQRPL | VTIKIGGQLK | EALLDTGADD  | TVLEEMNLPG    | RWKPKMIGGI   | GGFIKVRQYD | QILIEICGHK | AIGTVLVGPT | PVNIIGRNLL | TQIGCTLNF |
| HIV <sub>SQV-5μM</sub>                       | .....I     | .....      | .....       | .....D...     | .....V..     | ...V.....  | ..P.....   | ..C.....   | ...V.....M | .....     |
| HIV <sub>APV-5μM</sub>                       | .....F     | .....      | .....       | .....         | .....I..V    | .....      | .....      | .....      | ...V.....  | .....     |
| HIV <sub>LPV-5μM</sub>                       | .....F     | .....      | .....       | .....I.....   | .....IA...   | .....      | .....      | V.....     | ...V.....  | .....     |
| HIV <sub>IDV-5μM</sub>                       | .....F     | .....      | .....I..... | .....         | .....I....   | ...V.....  | ..P.....   | V.S.....   | ..T.....   | .....     |
| HIV <sub>NFV-5μM</sub>                       | .....F     | .....T     | .....N      | .....         | .....I....   | .....      | .....      | V..S.....  | .....      | .....     |
| HIV <sub>ATV-5μM</sub>                       | .....      | .....      | .....I..... | .....Q.....   | .....I..I..L | A.....     | ..P.....   | V.....     | ..T.....   | .....     |
| HIV <sub>TPV-15μM</sub>                      | .....I     | .....      | .....       | .....I..I.... | .....I....   | ...VR..... | ..VP.....  | V.S.....   | ..T.....M  | ..L.....  |
| HIV <sub>DRV<sup>R</sup><sub>P20</sub></sub> | .....I     | ...V...R   | ...I.....   | ..I..I....    | .....L....   | .....      | ..P.....   | .....      | ..A.....M  | .....     |
| HIV <sub>DRV<sup>R</sup><sub>P30</sub></sub> | .....I     | ...V...R   | ...I.....   | ..I..I....    | .....L....   | .....      | ..P.....Q  | .....      | ..A.V...M  | .....     |
| HIV <sub>DRV<sup>R</sup><sub>P51</sub></sub> | .....I     | ...V...R   | ...I.....   | ..IF..I....   | .....L....   | ...M.....  | ..P.....Q  | .....      | ..I.V...M  | .....     |
| HIV <sub>F16</sub>                           | .....F     | I.V...QM   | .....       | ..IV.AI....   | .....IV...   | ...M..K... | ..VPV..... | ..TA.....  | ...V...VM  | .....     |
| HIV <sub>F39</sub>                           | .....V     | I.VRV...T  | .....       | ..IF..I....   | K...L....    | ...L..K..E | ..P....E.T | IMS.....   | ...V...VM  | ..L.....  |
| HIV <sub>V42</sub>                           | .....V     | ..VV.V...M | .....       | ..IF.....     | ..T..IV...   | ...M....E  | NVP...Y.K. | ILS...I... | ..A.....VM | .....     |
| HIV <sub>T45</sub>                           | .....F     | IPV.V...PT | .....       | ..IF.GI....   | .....        | ...V.....  | ..VP.....T | I.S...A.   | ...V...VM  | ..L.....  |
| HIV <sub>T48</sub>                           | .....I     | ..V.V...V. | ...I.....   | ..IF.....     | ..E..L...V.  | ...L....E  | ..P.....   | V.S.....   | ..A.V..... | .....     |
| HIV <sub>F71</sub>                           | .....I     | IKV.....V  | .....       | ..IF.GID...   | .....LV...   | ...M..KE.. | ..PV.V.... | V.S.....   | ...V...MM  | .....     |

**Figure S1. Amino acid sequence of the PI-resistant HIV-1 variants.** Amino acid substitutions identified in protease-encoding region of laboratory-selected FDA-approved HIV variants (HIV<sub>SQV-5μM</sub>, HIV<sub>APV-5μM</sub>, HIV<sub>LPV-5μM</sub>, HIV<sub>IDV-5μM</sub>, HIV<sub>NFV-5μM</sub>, HIV<sub>ATV-5μM</sub>, and HIV<sub>TPV-15μM</sub>, and HIV<sub>DRV<sup>R</sup></sub>S: HIV<sub>DRV<sup>R</sup><sub>P20</sub></sub>, HIV<sub>DRV<sup>R</sup><sub>P30</sub></sub>, and HIV<sub>DRV<sup>R</sup><sub>P51</sub></sub>), and recombinant clinical HIV isolates (r<sub>CL</sub>HIV<sub>F16</sub>, r<sub>CL</sub>HIV<sub>F39</sub>, r<sub>CL</sub>HIV<sub>V42</sub>, r<sub>CL</sub>HIV<sub>T45</sub>, r<sub>CL</sub>HIV<sub>T48</sub>, and r<sub>CL</sub>HIV<sub>F71</sub>) compared to the wild-type HIV<sub>NL4-3</sub> are illustrated. Identity with the sequence at individual amino acid positions is indicated by a dot.

## Supplemental Figure 2

|           |                                          |                                                                                                                 |                                                                                                                |
|-----------|------------------------------------------|-----------------------------------------------------------------------------------------------------------------|----------------------------------------------------------------------------------------------------------------|
| <b>a.</b> | HIV <sub>P30</sub> <sup>22wkDRV</sup>    | CCT CAA ATC ACT CTT TGG CAA CGA CCC ATC GTC ACA ATA AAG GTA GGG GGG CAA CTA AGG GAA GCT CTA ATA GAT ACA GGA 81  | Pro Gln Ile Thr Leu Trp Gln Arg Pro Ile Val Thr Ile Lys Val Gly Gly Gln Leu Arg Glu Ala Leu Ile Asp Thr Gly 27 |
|           |                                          | GCA GAT GAT ACA ATA TTT GAA GAA ATA AAT TTG CCA GGA AGA TGG AAA CCA AAA TTG ATA GGG GGA ATT GGA GGT TTT ATG 162 | Ala Asp Asp Thr Ile Phe Glu Glu Ile Asn Leu Pro Gly Arg Trp Lys Pro Lys Leu Ile Gly Gly Ile Gly Gly Phe Met 54 |
|           |                                          | AAA GTA AGA CAG TAT GAT CAG ATA CCC ATA GAA ATC TGT GGG CAT CAA GCT ATA GGT ACA GTA TTA GTA GGA CCT ACA CCT 243 | Lys Val Arg Gln Tyr Asp Gln Ile Pro Ile Glu Ile Cys Gly His Gln Ala Ile Gly Thr Val Leu Val Gly Pro Thr Pro 81 |
|           |                                          | ATC AAC GTA ATT GGA AGA AAT ATG TTG ACT CAG ATT GGC TGC ACC TTA AAT TTC 297                                     | Ile Asn Val Ile Gly Arg Asn Met Leu Thr Gln Ile Gly Cys Thr Leu Asn Phe 99                                     |
| <b>b.</b> | HIV <sub>P30</sub> <sup>45wk003-15</sup> | CCT CAA ATC ACT CTT TGG CAA CGA CCC ATC GTC CCA ATA AAG GTA GGG GGG CAA CTA AGG GAA GCT CTA ATA GAT ACA GGA 81  | Pro Gln Ile Thr Leu Trp Gln Arg Pro Ile Val Pro Ile Lys Val Gly Gly Gln Leu Arg Glu Ala Leu Ile Asp Thr Gly 27 |
|           |                                          | GCA GAT GAT ACA ACA TTA AAA GAA ATA AAT TTG CCA GGA AGA TGG AAA CCA AAA TTG ATA GGG GGA ATT GGA GGT TTT ATC 162 | Ala Asp Asp Thr Thr Leu Lys Glu Ile Asn Leu Pro Gly Arg Trp Lys Pro Lys Leu Ile Gly Gly Ile Gly Gly Phe Ile 54 |
|           |                                          | AAA GTA AGA CAG TAT GAT CAG ATA CCC ATA GAA ATC TGT GGG CAT CAA GCT ATA GGT ACA GTA TTA GTA GGA CCT ACA CCT 243 | Lys Val Arg Gln Tyr Asp Gln Ile Pro Ile Glu Ile Cys Gly His Gln Ala Ile Gly Thr Val Leu Val Gly Pro Thr Pro 81 |
|           |                                          | ATC AAC GTA ATT GGA AGA AAT ATG TTG ACT AAG ATT GGC TGC ACC TTA AAT TTC 297                                     | Ile Asn Val Ile Gly Arg Asn Met Leu Thr Lys Ile Gly Cys Thr Leu Asn Phe 99                                     |
| <b>c.</b> | HIV <sub>P30</sub> <sup>45wk001-15</sup> | CCT CAA ATC ACT CTT TGG CAA CGA CCC ATC GTC ACA ATA AAG GTA GGG GGG CAA CTA AGG GAA GCT CTA ATA GAT ACA GGA 81  | Pro Gln Ile Thr Leu Trp Gln Arg Pro Ile Val Thr Ile Lys Val Gly Gly Gln Leu Arg Glu Ala Leu Ile Asp Thr Gly 27 |
|           |                                          | GCA GAT GAT ACA GTA TTA GAA GAA ATA AAT TTG CCA GGA AGA TGG AAA CCA AAA TTG ATA GGG GGA ATT GGA GGT TTT ATC 162 | Ala Asp Asp Thr Val Leu Glu Glu Ile Asn Leu Pro Gly Arg Trp Lys Pro Lys Leu Ile Gly Gly Ile Gly Gly Phe Ile 54 |
|           |                                          | AAA GTA AGA CAG TAT GAT CAG ATA CCC ATA GAA ATC TGT GGG CAT CAA GTT ATA GGT ACA GTA TTA GTA GGA CCT ACA CCT 243 | Lys Val Arg Gln Tyr Asp Gln Ile Pro Ile Glu Ile Cys Gly His Gln Val Ile Gly Thr Val Leu Val Gly Pro Thr Pro 81 |
|           |                                          | GTC AAC GTA ATT GGA AGA AAT ATG TTG ACT CAG ATT GGC TGC ACC TTA AAT TTC 297                                     | Val Asn Val Ile Gly Arg Asn Met Leu Thr Gln Ile Gly Cys Thr Leu Asn Phe 99                                     |

**Figure S2. Nucleotide and amino acid sequences of HIV variants selected with DRV, GRL-003-15, and GRL-001-15.** Nucleotide and amino acid sequences of the protease-encoding region of HIV variants obtained from selection of HIV<sub>DRV</sub><sup>R</sup><sub>P30</sub> in the presence of DRV (a), GRL-003-15 (b), or GRL-001-15 (c) are shown. Note that only the major clones obtained on weeks 22, 45, and 45 with DRV (HIV<sub>P30</sub><sup>22wkDRV</sup>), GRL-003-15 (HIV<sub>P30</sub><sup>45wk003-15</sup>), and GRL-001-15 (HIV<sub>P30</sub><sup>45wk001-15</sup>), respectively, are shown.

**Table S1** Partition and distribution coefficient of DRV, GRL-003-15, GRL-001-15, GRL-121-13, and GRL-142-13

| Compounds  | Concentration ( $\mu\text{M}$ ) |       |           |     | Log $P_{\text{octanol/partition}}$ * | Log $D_{\text{octanol/TBS}}$ * |
|------------|---------------------------------|-------|-----------|-----|--------------------------------------|--------------------------------|
|            | 1-Octanol                       | Water | 1-Octanol | TBS |                                      |                                |
| DRV        | 0.8                             | 9.4   | 0.6       | 9.3 | -1.08                                | -1.48                          |
| GRL-003-15 | 1.6                             | 9.4   | 1.5       | 9.4 | -0.76                                | -1.11                          |
| GRL-001-15 | 1.5                             | 8.6   | 1.1       | 8.4 | -0.76                                | -1.19                          |
| GRL-121-13 | 1.1                             | 9.5   | 0.8       | 9.9 | -0.92                                | -1.37                          |
| GRL-142-13 | 1.9                             | 9.0   | 1.7       | 8.8 | -0.67                                | -1.01                          |

\* The partition ( $\log P$ ) and distribution ( $\log D$ ) coefficients of GRL-003-15, GRL-001-15, GRL-121-13, and GRL-142-13 were determined. DRV was used as a control. 1-Octanol, an organic alcohol, and water were used for  $\log P$  determination, while tris buffered saline (TBS) (pH 7.4) and octanol were utilized for the  $\log D$  assay. Prior to the retrieval of actual values, a standard curve was generated as a reference. The drug concentrations for each compartment (octanol, water, and TBS) were measured at an absorbance of 230 using a light spectrophotometer.  $\log P$  and  $\log D$  values were calculated according to the formulas given in Materials and Methods.

**Table S2** Antiviral effects of GRL-003-15, GRL-001-15, and GRL-121-13 against selected PI-resistant HIV-1 variants and recombinant clinical HIV-1 isolates compared to that of DRV

| HIV strains                        | Fold change against DRV* |            |            |            |
|------------------------------------|--------------------------|------------|------------|------------|
|                                    | DRV                      | GRL-003-15 | GRL-001-15 | GRL-121-13 |
| HIV <sub>NL4-3</sub>               | 1                        | 0.016      | 0.020      | 0.10       |
| HIV <sub>SQV-5μM</sub>             | 1                        | 0.00011    | 0.013      | 0.00052    |
| HIV <sub>APV-5μM</sub>             | 1                        | 0.000021   | 0.0000070  | 0.00069    |
| HIV <sub>LPV-5μM</sub>             | 1                        | 0.00000043 | 0.000012   | 0.0000064  |
| HIV <sub>IDV-5μM</sub>             | 1                        | 0.000017   | 0.0000091  | 0.00025    |
| HIV <sub>NFV-5μM</sub>             | 1                        | 0.00017    | 0.000038   | 0.0047     |
| HIV <sub>ATV-5μM</sub>             | 1                        | 0.000035   | 0.000083   | 0.0019     |
| HIV <sub>TPV-15μM</sub>            | 1                        | 0.000017   | 0.0020     | 0.0030     |
| HIV <sub>DRV<sup>R</sup> P20</sub> | 1                        | 0.027      | 0.0046     | 0.053      |
| HIV <sub>DRV<sup>R</sup> P30</sub> | 1                        | 0.015      | 0.00079    | 0.11       |
| HIV <sub>DRV<sup>R</sup> P51</sub> | 1                        | 0.014      | 0.013      | 0.037      |
| rCLHIV <sub>F16</sub>              | 1                        | 0.00000025 | 0.00000018 | 0.00080    |
| rCLHIV <sub>F39</sub>              | 1                        | 0.011      | 0.011      | 0.013      |
| rCLHIV <sub>V42</sub>              | 1                        | 0.011      | 0.012      | 0.043      |
| rCLHIV <sub>T45</sub>              | 1                        | 0.019      | 0.019      | 0.017      |
| rCLHIV <sub>T48</sub>              | 1                        | 0.000010   | 0.0011     | 0.0019     |
| rCLHIV <sub>F71</sub>              | 1                        | 0.012      | 0.012      | 0.051      |

\*The values indicate fold change of EC<sub>50</sub> values of each HIV variant against those of DRV.
